# Supplementary material
Source: Springer Nature journal article supplement (https://www.springermedizin.de/resource/supplementary/13058_2009_2526_MOESM4_ESM.pdf/9701614)

**A**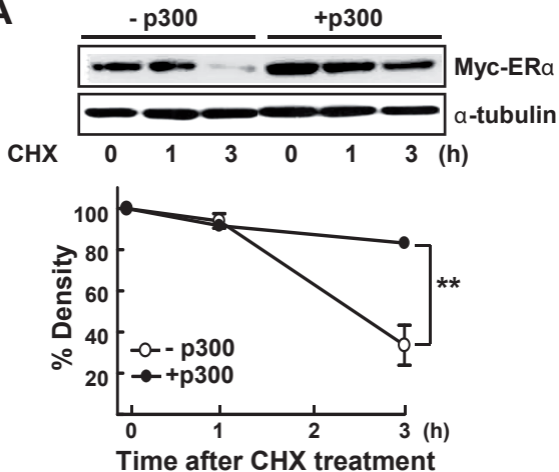**B**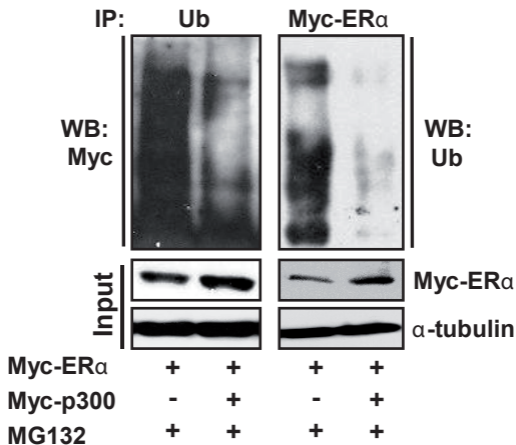

Supplement: MOESM4 [file 9701614]
